# Supplementary material for: Vitamin D Supplementation and Its Impact on Mortality and Cardiovascular Outcomes: Systematic Review and Meta-Analysis of 80 Randomized Clinical Trials
Source: MDPI journal article supplement (doi:10.3390/nu15081810), 2023-04-07
Supplement: s1 [file s1]

# Vitamin D Supplementation and Its Impact on Mortality and Cardiovascular Outcomes: Systematic Review and Meta-analysis of 80 Randomized Clinical Trials

## Supplementary Materials

**Table S1. Terms and search strategies.**

|                                                                                                                                                                                                                                                                                                                                                                                                                                                                                                                                                                                                                                                                                                                                                                                                                                                                                                                                                                                                                                                                                                                                                                                                                                                                                                                                                                                                                                                              |
|--------------------------------------------------------------------------------------------------------------------------------------------------------------------------------------------------------------------------------------------------------------------------------------------------------------------------------------------------------------------------------------------------------------------------------------------------------------------------------------------------------------------------------------------------------------------------------------------------------------------------------------------------------------------------------------------------------------------------------------------------------------------------------------------------------------------------------------------------------------------------------------------------------------------------------------------------------------------------------------------------------------------------------------------------------------------------------------------------------------------------------------------------------------------------------------------------------------------------------------------------------------------------------------------------------------------------------------------------------------------------------------------------------------------------------------------------------------|
| <ul style="list-style-type: none"> <li>• <b>Search terms:</b> "Vitamin D", "Calcitriol", "Calcifediol", "Cholecalciferol", "25-Hydroxyvitamin D 2", "Ergocalciferols", "calcium and vitamin D", "cardiovascular disease", "cardiovascular risk factors", "coronary heart disease", "myocardial infarction", "stroke", "heart failure" and "morbidity and/or mortality".</li> <li>• <b>Medical Subject Headings (MeSH):</b> *mortality; calcitriol [*therapeutic use]; cause of death; cholecalciferol [*therapeutic use]; dietary supplements; ergocalciferol [*therapeutic use]; hydroxycholecalciferols [*therapeutic use]; randomized controlled trials as topic; vitamins [*therapeutic use]</li> <li>• <b>AND:</b> vitamin D; humans; adult: 19+ years;</li> <li>• <b>NOT:</b> pregnancy; lactation; frail elderly; neoplasms; coronavirus; renal dialysis; renal insufficiency; acquired immunodeficiency syndrome; hospitalization; inpatient.</li> <li>• <b>Abbreviations:</b> '\$': stands for any character; '?': substitutes one or no character; adj: adjacent (i.e. number of words within range of search term); exp: exploded MeSH; MeSH: medical subject heading (MEDLINE medical index term); ab: abstract; ot: other term; pt: publication type; sh: MeSH; ti: title; tw: text word.</li> <li>• <b>Filters:</b> Full text, Randomized Controlled Trial, Humans, English, Adult: 19+ years, Exclude preprints, from 1983 – 2022.</li> </ul> |
| <ul style="list-style-type: none"> <li>• <b>EMBASE</b> <ol style="list-style-type: none"> <li>1. exp ergocalciferol/ or exp vitamin D/</li> <li>2. exp colecalciferol/</li> <li>3. exp dihydrotachysterol/</li> <li>4. exp 25 hydroxyvitamin D/</li> <li>5. exp hydroxycholecalciferol/</li> <li>6. (vitamin* D? or vitamin*D?).tw,ot.</li> <li>7. (cholecalciferol* or colecalciferol* or calcifediol* or calcitriol* or dihydrotachysterol* or hydroxyvitamin* d?).tw,ot.</li> <li>8. exp alfalcidol/</li> <li>9. (alfalcidol* or alphacalcidol*).tw,ot.</li> <li>10. or/1-9</li> <li>11. exp mortality/</li> <li>12. (mortality or mortaliti*).tw,ot.</li> <li>13. 11 or 12</li> <li>14. exp prevention/</li> <li>15. prevent*.tw,ot.</li> <li>16. exp neoplasm/</li> <li>17. or/14-16</li> </ol> </li> </ul>                                                                                                                                                                                                                                                                                                                                                                                                                                                                                                                                                                                                                                             |

18. randomized controlled trial/
19. double blind procedure/
20. single blind procedure/
21. exp randomization/
22. exp controlled clinical trial/
23. or/18-22
24. exp meta analysis/
25. (metaanaly\$ or meta analy\$ or meta?analy\$).ab,ti,ot.
26. ((review\$ or search\$) adj10 (literature\$ or medical database\$ or medline or pubmed or embase or cochrane or cinahl or psycinfo or psyclit or healthstar or biosis or current content\$ or systematic\$)).ab,ti,ot.
27. exp Literature/
28. exp Biomedical Technology Assessment/
29. hta.tw,ot.
30. (health technology adj6 assessment\$).tw,ot.
31. or/24-30
32. (comment or editorial or historical-article).pt.
33. 31 not 32
34. 23 or 33
35. 10 and 13 and 34
36. 10 and 17 and 34
37. 35 or 36
38. limit 37 to human

• **PubMed**

1. exp vitamin D/
2. exp cholecalciferol/
3. exp ergocalciferol/ or exp dihydrotachysterol/ or exp 25-hydroxyvitamin d 2/
4. exp Hydroxycholecalciferols/
5. vitamin D?.tw,ot.
6. (cholecalciferol\$ or calcifediol\$ or calcitriol\$ or dihydrotachysterol\$ or hydroxyvitamin\$ d?).tw,ot.
7. (alfacalcidol\$ or alphacalcidol\$ or colecalciferol\$).tw,ot.
8. or/1-7
9. exp Mortality/
10. mortality.tw,ot.
11. mortaliti\$.tw,ot.
12. or/9-11
13. exp Primary Prevention/
14. (prevention\$ or prevent\$).tw,ot.
15. exp Neoplasm/
16. (cancer\$ or neoplasm\$ or tumo?r\$).tw,ot.
17. or/13-16
18. exp Randomized Controlled Trials as topic/
19. Randomized Controlled Trial.pt.
20. exp Controlled Clinical Trials as topic/
21. Controlled Clinical Trial.pt.
22. exp Random Allocation/

23. exp Double-Blind Method/
24. exp Single-Blind Method/
25. or/18-24
26. exp "Review Literature as topic"/
27. exp Technology Assessment, Biomedical/
28. exp Meta-analysis as topic/
29. Meta-analysis.pt.
30. hta.tw,ot.
31. (health technology adj6 assessment\$).tw,ot.
32. (meta analy\$ or metaanaly\$ or meta?analy\$).tw,ot.
33. ((review\$ or search\$) adj10 (literature\$ or medical database\$ or medline or pubmed or embase or cochrane or cinahl or psycinfo or psyclit or healthstar or biosis or current content\$ or systemat\$)).tw,ot.
34. or/26-33
35. 25 or 34
36. 8 and 17 and 35
37. 8 and 12 and 35
- 38 36 or 37
39. limit 38 to animals
40. limit 38 to humans
41. 39 not 40
42. 38 not 41

- **The Cochrane Library**

1. MeSH descriptor Vitamin D explode all trees
2. MeSH descriptor Cholecalciferol explode all trees
3. MeSH descriptor Ergocalciferols explode all trees
4. MeSH descriptor Dihydroxycholesterol explode all trees
5. MeSH descriptor 25-hydroxyvitamin D 2 explode all trees
6. MeSH descriptor Hydroxycholecalciferols explode all trees
7. ((vitamin\* in All Text and d in All Text and 2 in All Text) or (vitamin\* in All Text and d2 in All Text))
8. (cholecalciferol\* in All Text or calciferol\* in All Text or calcitriol\* in All Text or dihydroxycholesterol\* in All Text or (hydroxyvitamin\* in All Text and d\* in All Text) )
9. (alfacalcidol\* in All Text or alphacalcidol\* in All Text or cholecalciferol\* in All Text)
10. (#1 or #2 or #3 or #4 or #5 or #6 or #7 or #8 or #9)
11. MeSH descriptor Mortality explode all trees
12. (mortality in All Text or mortaliti\* in All Text)
13. (#11 or #12)
14. MeSH descriptor Primary Prevention explode all trees
15. prevent\* in All Text
16. MeSH descriptor Neoplasms explode all trees
17. (#14 or #15 or #16)
18. (#10 and #13)
19. (#10 and #17)
20. (#18 or #19)

**Table S2. Characteristics of good-quality RCTs [22-56].**

| Study, authors.<br>publication year | Location       | Intervention<br>vitamin D3 *<br>(IU) | Intervention<br>vitamin D2*<br>(IU) | Intervention<br>1 $\alpha$ (OH)D *<br>(mcg) | Intervention<br>eldecalcitol*<br>(mcg) | Intervention<br>calcium *<br>(mg) | Control:<br>placebo or<br>calcium *<br>(mg) | Treatment<br>median<br>(years) | Follow-up<br>median<br>(years) | Intervention<br>(No) | Control<br>(No) |
|-------------------------------------|----------------|--------------------------------------|-------------------------------------|---------------------------------------------|----------------------------------------|-----------------------------------|---------------------------------------------|--------------------------------|--------------------------------|----------------------|-----------------|
| Lips et al. 1996                    | Netherlands    | 400                                  |                                     |                                             |                                        |                                   |                                             | 3.50                           | 3.50                           | 1291                 | 1287            |
| Meyer et al. 2002                   | Norway         | 400                                  |                                     |                                             |                                        |                                   |                                             | 2.00                           | 2.00                           | 569                  | 575             |
| BDS, Trivedi et al.<br>2003         | UK             | 822                                  |                                     |                                             |                                        |                                   |                                             | 5.00                           | 5.00                           | 1345                 | 1341            |
| Flicker et al. 2005                 | Australia      |                                      | 1429                                |                                             |                                        | 600                               | 600                                         | 2.00                           | 2.00                           | 313                  | 312             |
| Bolton et al. 2007                  | UK             | 400                                  |                                     |                                             |                                        | 1000                              |                                             | 2.00                           | 2.00                           | 62                   | 61              |
| Lyons et al. 2007                   | UK             |                                      | 822                                 |                                             |                                        |                                   |                                             | 3.00                           | 3.00                           | 1725                 | 1715            |
| WHI, Hsia et al. 2007               | USA            | 400                                  |                                     |                                             |                                        | 1000                              |                                             | 7.00                           | 7.00                           | 18176                | 18106           |
| Prince et al. 2008                  | Australia      |                                      | 1000                                |                                             |                                        | 1000                              | 1000                                        | 1.00                           | 1.00                           | 151                  | 151             |
| Zhu et al. 2008                     | Australia      |                                      | 1000                                |                                             |                                        | 1200                              |                                             | 5.00                           | 5.00                           | 39                   | 81              |
| Vital D, Sanders et al.<br>2010     | Australia      | 1370                                 |                                     |                                             |                                        |                                   |                                             | 2.96                           | 2.96                           | 1131                 | 1127            |
| Lehouck et al. 2012                 | Belgium        | 3571                                 |                                     |                                             |                                        |                                   |                                             | 1.00                           | 1.00                           | 91                   | 91              |
| VIDARIS, Murdoch et<br>al. 2012     | New<br>Zealand | 10989                                |                                     |                                             |                                        |                                   |                                             | 1.50                           | 1.50                           | 161                  | 161             |
| Davidson et al. 2013                | USA            | 12695                                |                                     |                                             |                                        |                                   |                                             | 1.00                           | 1.00                           | 56                   | 53              |
| VitDISH, Witham et<br>al. 2013      | UK             | 3333                                 |                                     |                                             |                                        |                                   |                                             | 1.00                           | 1.00                           | 80                   | 79              |
| RECORD, Ford et al.<br>2014         | UK             | 800                                  |                                     |                                             |                                        | 1000                              | 1000                                        | 3.00                           | 3.00                           | 2649                 | 2643            |
| Baron et al. 2015                   | USA            | 1000                                 |                                     |                                             |                                        | 37% 1200                          | 37% 1200                                    | 3.80                           | 3.80                           | 1130                 | 1129            |
| Hansen et al. 2015                  | USA            | 800-3333                             |                                     |                                             |                                        |                                   |                                             | 1.00                           | 1.00                           | 154                  | 76              |
| Uusi-Rasi et al. 2015               | Finland        | 800                                  |                                     |                                             |                                        |                                   |                                             | 2.00                           | 2.00                           | 204                  | 205             |
| ViDiCO, Martineau et<br>al. 2015    | UK             | 2000                                 |                                     |                                             |                                        |                                   |                                             | 1.00                           | 1.00                           | 122                  | 118             |

|                                 |                      |           |      |                |                |      |      |       |       |
|---------------------------------|----------------------|-----------|------|----------------|----------------|------|------|-------|-------|
| VIDEO, Arden et al. 2016        | UK                   | 800       |      |                |                | 3.00 | 3.00 | 237   | 237   |
| Brisson et al. 2017             | Canada               | 1000-3000 |      |                |                | 1.00 | 1.00 | 306   | 99    |
| Lappe et al. 2017               | USA                  | 2000      |      | 1500           |                | 4.00 | 4.00 | 1156  | 1147  |
| BEST-D, Hin et al. 2017         | UK                   | 2000-4000 |      |                |                | 1.00 | 1.00 | 204   | 101   |
| ViDA, Scragg et al. 2017        | New Zealand          | 3333      |      |                |                | 3.30 | 3.30 | 2558  | 2550  |
| Nahas et al. 2018               | Brazil               | 1000      |      |                |                | 0.75 | 0.75 | 80    | 80    |
| ViDOS, Smith et al. 2018        | USA                  | 400-4800  |      | 600            | 600            | 1.00 | 1.00 | 172   | 22    |
| Shea et al. 2019                | USA                  | 858       |      |                |                | 1.00 | 1.00 | 49    | 51    |
| VITAL, Manson et al. 2019       | USA                  | 2000      |      | 50% 1g EPA-DHA | 50% 1g EPA-DHA | 5.30 | 5.30 | 12927 | 12944 |
| Jeong et al. 2020               | Korea                | 800       |      | 1000           |                | 1.00 | 1.00 | 445   | 512   |
| Lukenda et al. 2020             | Croatia              | 1000      |      |                |                | 1.00 | 1.00 | 201   | 110   |
| Yang et al. 2020                | China                | 800       |      |                |                | 1.00 | 1.00 | 93    | 90    |
| DO-HEALTH, Bischoff et al. 2020 | 5 European countries | 2000      |      | 50% 1g EPA-DHA | 50% 1g EPA-DHA | 2.99 | 2.99 | 1076  | 1081  |
| VIDAL, Rake et al. 2020         | UK                   | 3333      |      |                |                | 1.00 | 1.00 | 802   | 813   |
| DPVD, Kawahara et al. 2022      | Japan                |           | 0.75 |                |                | 3.00 | 3.00 | 630   | 626   |
| D-Health, Neale et al. 2022     | Australia            | 2000      |      |                |                | 5.00 | 5.00 | 10661 | 10649 |
| FIND, Virtanen et al. 2022      | Finland              | 1600-3200 |      | 1350-1413      | 1344           | 5.00 | 5.00 | 1665  | 830   |

RCTs: randomized clinical trials; \*: daily dose; SD: standard deviation; IQR: interquartile range; No: participants number; EPA-DHA: eicosapentaenoic acid-docosahexaenoic acid.

**Table S3. Characteristics of fair-quality RCTs [57-90]**

| Study, authors.<br>publication year  | Location           | Intervention<br>vitamin D3*<br>(IU) | Intervention<br>vitamin D2*<br>(IU) | Intervention<br>1 $\alpha$ (OH)D*<br>(mcg) | Intervention<br>1,25(OH) <sub>2</sub> D*<br>(mcg) | Intervention<br>calcium*<br>(mg) | Control: placebo<br>or calcium*<br>(mg) | Treatment<br>median<br>(years) | Follow-up<br>median<br>(years) | Intervention<br>(No) | Control<br>(No) |
|--------------------------------------|--------------------|-------------------------------------|-------------------------------------|--------------------------------------------|---------------------------------------------------|----------------------------------|-----------------------------------------|--------------------------------|--------------------------------|----------------------|-----------------|
| Ott & Chesnut. 1989                  | USA                |                                     |                                     |                                            | 0.43                                              | 1000                             | 1000                                    | 2.00                           | 2.00                           | 43                   | 43              |
| Dawson et al. 1991                   | USA                | 400                                 |                                     |                                            |                                                   | 377                              | 377                                     | 1.00                           | 1.00                           | 138                  | 138             |
| Chapuy et al. 1992                   | France             | 800                                 |                                     |                                            |                                                   | 1200                             |                                         | 1.50                           | 1.50                           | 1634                 | 1636            |
| Chen et al. 1997                     | Japan              |                                     |                                     | 0.75                                       |                                                   | 150                              | 150                                     | 1.00                           | 1.00                           | 25                   | 25              |
| Dawson et al. 1997                   | USA                | 700                                 |                                     |                                            |                                                   | 500                              |                                         | 3.00                           | 3.00                           | 202                  | 187             |
| Baeksgaard et al.<br>1998            | Denmark            | 560                                 |                                     |                                            |                                                   | 1000                             |                                         | 2.00                           | 2.00                           | 80                   | 80              |
| Krieg et al. 1999                    | Switzerland        | 880                                 |                                     |                                            |                                                   | 1000                             |                                         | 2.00                           | 2.00                           | 124                  | 124             |
| KORFPS,<br>Komulainen et al.<br>1999 | Finland            | 300                                 |                                     |                                            |                                                   | 500                              |                                         | 5.00                           | 5.00                           | 116                  | 116             |
| STOP IT, Gallagher<br>et al. 2001    | USA                |                                     |                                     |                                            | 0.50                                              |                                  |                                         | 3.00                           | 5.00                           | 123                  | 123             |
| Decalyos II, Chapuy<br>et al. 2002   | France             | 800                                 |                                     |                                            |                                                   | 1200                             |                                         | 2.00                           | 2.00                           | 389                  | 194             |
| Cooper et al. 2003                   | Australia          |                                     | 1429                                |                                            |                                                   | 1000                             | 1000                                    | 2.00                           | 2.00                           | 93                   | 94              |
| Larsen et al. 2004                   | Denmark            | 400                                 |                                     |                                            |                                                   | 1000                             |                                         | 3.50                           | 3.50                           | 4957                 | 4648            |
| Aloia et al. 2005                    | USA                | 800-2000                            |                                     |                                            |                                                   | 1350                             | 1350                                    | 3.00                           | 3.00                           | 104                  | 104             |
| Brazier et al. 2005                  | France             | 800                                 |                                     |                                            |                                                   | 1000                             |                                         | 1.00                           | 1.00                           | 95                   | 97              |
| Porthouse et al. 2005                | UK                 | 800                                 |                                     |                                            |                                                   | 1000                             |                                         | 2.08                           | 2.08                           | 1321                 | 1993            |
| VIP, Campbell et al.<br>2005         | New<br>Zealand     | 1667-3333                           |                                     |                                            |                                                   |                                  |                                         | 1.00                           | 1.00                           | 195                  | 196             |
| Lappe et al. 2007                    | USA                | 1000                                |                                     |                                            |                                                   | 1500                             | 1500                                    | 4.00                           | 4.00                           | 446                  | 733             |
| Smith et al. 2007                    | UK                 |                                     | 822                                 |                                            |                                                   |                                  |                                         | 3.00                           | 3.00                           | 4727                 | 4713            |
| Pfeifer et al. 2009                  | Austria<br>Germany | 800                                 |                                     |                                            |                                                   | 1000                             | 1000                                    | 1.00                           | 1.00                           | 121                  | 121             |

|                                       |               |          |      |      |      |      |      |      |      |
|---------------------------------------|---------------|----------|------|------|------|------|------|------|------|
| Zitterman et al. 2009                 | Germany       | 3332     |      |      |      | 1.00 | 1.00 | 100  | 100  |
| OSTPRE-FPS,<br>Kärkkäinen et al. 2010 | Finland       | 800      |      | 1000 |      | 3.00 | 3.00 | 290  | 313  |
| TIDE, Punthakee et al. 2012           | International | 1000     |      |      |      | 5.50 | 5.50 | 607  | 614  |
| VICTORY, Wood et al. 2012             | UK            | 400-1000 |      |      |      | 1.00 | 1.00 | 203  | 102  |
| ViDA, Mason et al. 2014               | USA           | 2000     |      |      |      | 1.00 | 1.00 | 109  | 109  |
| VITADAS,<br>Gallagher et al. 2014     | USA           | 400-2400 |      |      |      | 1.00 | 1.00 | 160  | 38   |
| DIVA, Barengolts et al. 2015          | USA           |          | 7143 | 400  | 400  | 1.00 | 1.00 | 103  | 102  |
| Jin et al. 2016                       | Australia     | 1667     |      |      |      | 2.00 | 2.00 | 209  | 204  |
| Jorde et al. 2016                     | Norway        | 2857     |      |      |      | 5.00 | 5.00 | 256  | 255  |
| VINDICATE, Witte et al. 2016          | UK            | 4000     |      |      |      | 1.00 | 1.00 | 114  | 109  |
| EVIDENCE,<br>Moreira et al. 2017      | Canada        | 4000     |      |      |      | 0.46 | 0.46 | 35   | 36   |
| EVITA, Zittermann et al. 2017         | Germany       | 4000     |      |      |      | 3.00 | 3.00 | 199  | 201  |
| D2d, Pittas et al. 2019               | USA           | 4000     |      |      |      | 2.50 | 2.50 | 1211 | 1212 |
| PODA, Aloia et al. 2019               | USA           | 3490     |      | 1200 | 1200 | 3.00 | 3.00 | 130  | 130  |
| CALGB, Charlamb et al. 2021           | USA           | 2000     |      |      |      | 1.00 | 1.00 | 142  | 148  |
| Hu et al. 2023                        | China         | 800      |      |      |      | 2.50 | 2.50 | 135  | 135  |

RCTs: randomized clinical trials; \*: daily dose; SD: standard deviation; IQR: interquartile range; No: participants number.

**Table S4. Characteristics of low-quality RCTs [91-101]**

| Study, authors.<br>publication year | Location  | Intervention<br>vitamin D3*<br>(UI) | Intervention<br>vitamin D2*<br>(mg) | Intervention calcium*<br>(mg) | Control:<br>placebo or<br>calcium*<br>(mg) | Treatment<br>median<br>(years) | Follow-up<br>median<br>(years) | Intervention<br>(No) | Control<br>(No) |
|-------------------------------------|-----------|-------------------------------------|-------------------------------------|-------------------------------|--------------------------------------------|--------------------------------|--------------------------------|----------------------|-----------------|
| Inkovaara et al. 1983               | Finland   | 1000                                |                                     | 1200 (50%)                    | 1200 (50%)                                 | 0.75                           | 1.00                           | 91                   | 84              |
| Meier et al. 2004                   | Germany   | 500                                 |                                     | 500                           |                                            | 0.50                           | 1.00                           | 30                   | 25              |
| NONOF, Harwood et<br>al. 2004       | UK        | 800                                 | 822                                 | 1000                          |                                            | 1.00                           | 1.00                           | 113                  | 37              |
| Moschonis & Manios<br>2006          | Greece    | 300                                 |                                     | 1200                          |                                            | 1.00                           | 1.00                           | 42                   | 70              |
| Daly & Nowson 2009                  | Australia | 800                                 |                                     | 1000                          |                                            | 2.00                           | 3.50                           | 85                   | 82              |
| Nieves et al. 2012                  | USA       | 1000                                |                                     | 1000                          | 1000                                       | 2.00                           | 2.00                           | 64                   | 63              |
| Toss & Magnusson<br>2012            | Sweden    | 1600                                |                                     | 1000                          | 1000                                       | 1.00                           | 1.00                           | 28                   | 28              |
| Kuchay et al. 2015                  | India     | 2466                                |                                     |                               |                                            | 1.00                           | 1.00                           | 69                   | 68              |
| Sinha-Hikim et al.<br>2015          | USA       | 12186                               |                                     |                               |                                            | 1.00                           | 1.00                           | 40                   | 40              |
| PREVENT-WIN, Bhatt<br>et al. 2020   | India     | 200-8571                            |                                     | 1000                          | 1000                                       | 1.50                           | 1.50                           | 61                   | 60              |
| Vahdat et al. 2022                  | Iran      | 1000                                |                                     |                               |                                            | 1.00                           | 1.00                           | 55                   | 54              |

RCTs: randomized clinical trials; \*: daily dose; SD: standard deviation; IQR: interquartile range; No: participants number.



**Table S5. Baseline characteristics of participants from good-quality RCTs [22-56]**

| Study, authors.<br>publication year | Participants<br>(No) | Age<br>Mean $\pm$ SD<br>Median<br>(IQR)<br>(years) | Female<br>(%) | Current<br>smoking<br>(%) | HTN<br>(%) | Prediabetes<br>(%) | DM<br>(%) | High<br>cholesterol or<br>lowering<br>medication<br>(%) |
|-------------------------------------|----------------------|----------------------------------------------------|---------------|---------------------------|------------|--------------------|-----------|---------------------------------------------------------|
| Lips et al. 1996                    | 2 578                | 80 $\pm$ 6                                         | 74.3          |                           |            |                    |           |                                                         |
| Meyer et al. 2002                   | 1 144                | 84.8                                               | 75.9          |                           |            |                    |           |                                                         |
| BDS, Trivedi et al. 2003            | 2686                 | 74.8 $\pm$ 4.6                                     | 24.2          | 4.2                       |            |                    |           |                                                         |
| Flicker et al. 2005                 | 625                  | 83.4 $\pm$ 8.3                                     | 95.0          |                           |            |                    |           |                                                         |
| Bolton et al. 2007                  | 123                  | 68                                                 | 100.0         |                           |            |                    |           |                                                         |
| Lyons et al. 2007                   | 3 440                | 84 $\pm$ 7.5                                       | 76.3          |                           |            |                    |           |                                                         |
| WHI, Hsia et al. 2007               | 36 282               | 62.4 $\pm$ 6.9                                     | 100.0         | 7.7                       | 33.3       |                    | 5.8       | 12.2                                                    |
| Prince et al. 2008                  | 302                  | 77.2 $\pm$ 4.6                                     | 100.0         |                           |            |                    |           |                                                         |
| Zhu et al. 2008                     | 120                  | 75 (70-80)                                         | 100.0         |                           |            |                    |           |                                                         |
| Vital D, Sanders et al. 2010        | 2 258                | 76.0 (73-80)                                       | 100.0         |                           |            |                    |           |                                                         |
| Lehouck et al. 2012                 | 182                  | 68                                                 | 20.3          |                           |            |                    |           |                                                         |
| VIDARIS, Murdoch et al. 2012        | 322                  | 47.5 $\pm$ 10.0                                    | 74.8          | 5.3                       |            |                    | 1.2       |                                                         |
| Davidson et al. 2013                | 109                  | 52.4 $\pm$ 7.5                                     | 81.6          |                           |            | 100                | 0         |                                                         |
| VitDISH, Witham et al. 2013         | 159                  | 76.8 $\pm$ 4.7                                     | 48.4          |                           | 100        |                    | 14        |                                                         |
| RECORD, Ford et al. 2014            | 5 292                | 77.5 $\pm$ 6                                       | 84.7          | 11.5                      |            |                    | 7.9       |                                                         |
| Baron et al. 2015                   | 2259                 | 58.3                                               | 37.0          | 11.6                      |            |                    |           |                                                         |
| Hansen et al. 2015                  | 230                  | 61.0 $\pm$ 6.0                                     | 100.0         |                           |            |                    |           |                                                         |
| Uusi-Rasi et al. 2015               | 409                  | 74.2 $\pm$ 3.0                                     | 100.0         | 19.3                      | 44.7       |                    | 9         |                                                         |
| ViDiCO, Martineau et al. 2015       | 240                  | 64.7 $\pm$ 8.1                                     | 40.0          | 40.8                      |            |                    |           |                                                         |
| VIDEO, Arden et al. 2016            | 474                  | 64 $\pm$ 8                                         | 61.0          |                           |            |                    |           |                                                         |
| Brisson et al. 2017                 | 405                  | 57.8 $\pm$ 5.5                                     | 100.0         |                           |            |                    |           |                                                         |
| Lappe et al. 2017                   | 2 303                | 65.2 $\pm$ 7.0                                     | 100.0         | 6.1                       |            |                    |           |                                                         |
| BEST-D, Hin et al. 2017             | 305                  | 72 $\pm$ 6                                         | 49.0          | 12                        | 39         |                    | 9         | 27.5                                                    |
| ViDA, Scragg et al. 2017            | 5 108                | 65.9 $\pm$ 8.3                                     | 41.9          | 6.3                       | 36.9       |                    | 9.9       |                                                         |
| Nahas et al. 2018                   | 160                  | 59.1 $\pm$ 6.7                                     | 23.7          |                           |            |                    |           |                                                         |
| ViDOS, Smith et al. 2018            | 194                  | 66.7 $\pm$ 7.2                                     | 100.0         | 10.4                      |            |                    |           |                                                         |
| Shea et al. 2019                    | 100                  | 69.6 $\pm$ 6.9                                     | 36.0          |                           |            |                    |           | 62.0                                                    |
| VITAL, Manson et al. 2019           | 25 871               | 67.1 $\pm$ 7.1                                     | 50.6          | 7.2                       | 49.8       |                    | 13.7      | 37.5                                                    |
| Jeong et al. 2020                   | 957                  | 60.9 $\pm$ 11.9                                    | 64.4          |                           |            |                    |           |                                                         |
| Lukenda et al. 2020                 | 311                  | 65.0 (21.5-84.0)                                   | 42.8          |                           | 52.7       |                    | 55        | 47.9                                                    |

|                                       |        |            |      |      |      |      |      |
|---------------------------------------|--------|------------|------|------|------|------|------|
| Yang et al. 2020                      | 183    | 66.9 ± 5.7 | 55.2 | 7.1  | 36.6 | 14.8 |      |
| DO-HEALTH,<br>Bischoff et al.<br>2020 | 2 157  | 75.0 ± 4.5 | 61.7 | 5.8  | 49.6 |      |      |
| VIDAL, Rake et<br>al. 2020            | 1 615  | 65-84      | 46.9 |      |      |      |      |
| DPVD,<br>Kawahara et al.<br>2022      | 1 256  | 61.3 ± 8.9 | 45.5 |      | 100  | 0    |      |
| D-Health, Neale<br>et al. 2022        | 21 310 | 69.3 ± 5.5 | 44.3 | 4.2  | 41.6 | 8.3  | 32.2 |
| FIND, Virtanen<br>et al. 2022         | 2 495  | 68.2       | 43.3 | 35.7 | 42.3 | 9.0  | 29.0 |

RCTs: randomized clinical trials; No: number; HTN: arterial hypertension; DM:

**Table S6. Baseline characteristics of participants from fair-quality RCTs [57-90]**

| Study, authors, publication year         | Participants (No) | Female (%) | Age<br>Mean $\pm$ SD<br>Median<br>(IQR)<br>(years) | Current<br>smokin<br>g (%) | HTN<br>(%) | Prediabete<br>s (%) | DM (%) | High<br>cholesterol or<br>lowering<br>medication<br>(%) |
|------------------------------------------|-------------------|------------|----------------------------------------------------|----------------------------|------------|---------------------|--------|---------------------------------------------------------|
| Ott & Chesnut.<br>1989                   | 86                | 100.0      | 67.5                                               |                            |            |                     |        |                                                         |
| Dawson et al.<br>1991                    | 276               | 100.0      | 61.7 $\pm$ 0.5                                     | 7.4                        |            |                     |        |                                                         |
| Chapuy et al.<br>1992                    | 3 270             | 100.0      | 84 $\pm$ 6                                         |                            |            |                     |        |                                                         |
| Chen et al. 1997                         | 50                | 50.0       | 52.3 $\pm$ 0.7                                     |                            |            |                     |        |                                                         |
| Dawson et al.<br>1997                    | 389               | 55.0       | 71 $\pm$ 4                                         | 5.7                        |            |                     |        |                                                         |
| Baeksgaard et al.<br>1998                | 160               | 100.0      | 62.5 (58-67)                                       |                            |            |                     |        |                                                         |
| Krieg et al. 1999                        | 248               | 100.0      | 84.5 $\pm$ 7.5                                     |                            |            |                     |        |                                                         |
| KORFPS,<br>Komulainen et<br>al. 1999     | 232               | 100.0      | 52.7 (47-56)                                       |                            |            |                     | 2.2    |                                                         |
| STOP IT,<br>Gallagher et al.<br>2001     | 246               | 100.0      | 71.5                                               |                            |            |                     |        |                                                         |
| Decalyos II,<br>Chapuy et al.<br>2002    | 583               | 100.0      | 85.2 $\pm$ 7.1                                     |                            |            |                     |        |                                                         |
| Cooper et al.<br>2003                    | 187               | 100.0      | 56.3 $\pm$ 4.5                                     |                            |            |                     |        |                                                         |
| Larsen et al.<br>2004                    | 9 605             | 60.1       | 74 (66-103)                                        |                            |            |                     |        |                                                         |
| Aloia et al. 2005                        | 208               | 100.0      | 60.5 $\pm$ 6.3                                     | 6.7                        |            |                     |        |                                                         |
| Brazier et al.<br>2005                   | 192               | 100.0      | 74.6 $\pm$ 6.9                                     |                            |            |                     |        |                                                         |
| Porthouse et al.<br>2005                 | 3314              | 100.0      | 76.8                                               |                            |            |                     |        |                                                         |
| VIP, Campbell et<br>al. 2005             | 391               | 68.0       | 83.6 $\pm$ 4.8                                     |                            |            |                     |        |                                                         |
| Lappe et al. 2007                        | 1 179             | 100.0      | 66.7 $\pm$ 7.3                                     |                            |            |                     |        |                                                         |
| Smith et al. 2007                        | 9440              | 53.9       | 79.1 (76.9-<br>82.7)                               |                            |            |                     |        |                                                         |
| Pfeifer et al. 2009                      | 242               | 89.0       | 76.5 $\pm$ 4.0                                     |                            |            |                     |        |                                                         |
| Zitterman et al.<br>2009                 | 200               | 69.3       | 48.1 $\pm$ 10.2                                    |                            |            |                     |        |                                                         |
| OSTPRE-FPS,<br>Kärkkäinen et al.<br>2010 | 603               | 100.0      | 67. 4 $\pm$ 2.0                                    | 4.8                        | 53.9       |                     |        |                                                         |
| TIDE, Punthakee<br>et al. 2012           | 1 221             | 40.9       | 66.6 $\pm$ 6.5                                     | 12.4                       | 87.8       |                     | 100    | 76.6                                                    |
| VICtORy, Wood<br>et al. 2012             | 305               | 100.0      | 63.8 $\pm$ 2.2                                     |                            |            |                     |        |                                                         |
| ViDA, Mason et<br>al. 2014               | 218               | 100.0      | 59.6 $\pm$ 5.1                                     |                            |            |                     |        |                                                         |
| VITADAS,<br>Gallagher et al.<br>2014     | 198               | 100.0      | 36.7 $\pm$ 5.9                                     | 18                         |            |                     |        |                                                         |
| DIVA,<br>Barengolts et al.<br>2015       | 205               | 0.0        | 59.0 $\pm$ 6.0                                     | 58.5                       | 13.2       |                     | 45.9   |                                                         |
| Jin et al. 2016                          | 413               | 50.0       | 63.2 $\pm$ 7.1                                     |                            |            |                     |        |                                                         |

|                                     |       |       |             |      |      |       |       |      |
|-------------------------------------|-------|-------|-------------|------|------|-------|-------|------|
| Jorde et al. 2016                   | 511   | 38.6  | 62.1 ± 8.6  | 20.7 | 47.0 | 100.0 | 0     | 26.6 |
| VINDICATE,<br>Witte et al. 2016     | 223   | 20.9  | 68.7 ± 13.1 |      |      |       | 22.7  |      |
| EVIDENCE,<br>Moreira et al.<br>2017 | 71    | 53.5  | 47.3 ± 14.3 |      |      | 49.3  | 11.3  |      |
| EVITA,<br>Zittermann et al.<br>2017 | 400   | 17.0  | 55 (18-79)  |      | 30.0 |       | 24.3  | 54.5 |
| D2d, Pittas et al.<br>2019          | 2 423 | 44.8  | 60.0 ± 9.9  |      |      |       |       |      |
| PODA, Aloia et<br>al. 2019          | 260   | 100.0 | 68.2 ± 4.9  | 4.6  |      |       |       |      |
| CALGB,<br>Charlamb et al.<br>2021   | 290   | 100.0 | 42.6 ± 6.3  |      |      |       |       |      |
| Hu et al. 2023                      | 270   | 73.6  | 66.1 ± 8.6  |      |      |       | 100.0 |      |

RCTs: randomized clinical trials; No: number; HTN: arterial hypertension; DM: diabetes mellitus.

**Table S7. Baseline characteristics of participants from low-quality RCTs [91-101]**

| Study, authors.<br>publication year | Participants<br>(No) | Female<br>(%) | Age<br>Mean $\pm$ SD<br>Median (IQR)<br>(years) | Current<br>smokin<br>g (%) | HT<br>N<br>(%) | Prediabetes<br>(%) | DM<br>(%) |
|-------------------------------------|----------------------|---------------|-------------------------------------------------|----------------------------|----------------|--------------------|-----------|
| Inkovaara et al.<br>1983            | 175                  | 81.7          | 79.3 $\pm$ 6.6                                  |                            |                |                    |           |
| Meier et al. 2004                   | 55                   | 65            | 56.5 $\pm$ 11.1                                 | 13.7                       |                |                    |           |
| NONOF,<br>Harwood et al.<br>2004    | 150                  | 100.0         | 81.2 (67-92)                                    |                            |                |                    |           |
| Moschonis &<br>Manios 2006          | 112                  | 100.0         | 60.3                                            |                            |                |                    |           |
| Daly & Nowson<br>2009               | 167                  | 0.0           | 61.3 $\pm$ 7.7                                  | 4.9                        |                |                    | 20.2      |
| Nieves et al. 2012                  | 127                  | 100.0         | 61.8 $\pm$ 8.1                                  |                            |                |                    |           |
| Toss &<br>Magnusson 2012            | 56                   | 71.4          | 70.0 $\pm$ 8.0                                  |                            |                |                    |           |
| Kuchay et al. 2015                  | 137                  | 50.0          | 47 $\pm$ 11                                     |                            |                | 100                | 0         |
| Sinha-Hikim et al.<br>2015          | 80                   | 70.0          | 52.0 $\pm$ 7.2                                  |                            |                | 100                | 0         |
| PREVENT-WIN,<br>Bhatt et al. 2020   | 121                  | 100.0         | (20-60)                                         | 3.3                        | 36.4           |                    | 0         |
| Vahdat et al. 2022                  | 109                  | 100.0         | 37.9 $\pm$ 6.5                                  |                            |                |                    |           |

RCTs: randomized clinical trials; \*: daily dose; SD: standard deviation; IQR: interquartile range; No: number; HTN: arterial hypertension; DM: diabetes mellitus.

**Table S8. RCTs included according to outcomes analysis**

| ACM                                | CVM                          | Non-CVM                      | MI                       | Stroke                   | HF                       | MACE                     | MACE+                        |
|------------------------------------|------------------------------|------------------------------|--------------------------|--------------------------|--------------------------|--------------------------|------------------------------|
| Lips et al. 1996                   |                              |                              |                          |                          |                          |                          |                              |
| Meyer et al. 2002                  |                              |                              |                          |                          |                          |                          |                              |
| BDS, Trivedi et al. 2003           | BDS, Trivedi et al. 2003     | BDS, Trivedi et al. 2003     | BDS, Trivedi et al. 2003 | BDS, Trivedi et al. 2003 | BDS, Trivedi et al. 2003 |                          |                              |
| Flicker et al. 2005                |                              |                              |                          |                          |                          |                          |                              |
| Bolton et al. 2007                 | Bolton et al. 2007           | Bolton et al. 2007           |                          |                          |                          |                          |                              |
| Lyons et al. 2007                  |                              |                              |                          |                          |                          |                          |                              |
| WHI, Hsia et al. 2007              | WHI, Hsia et al. 2007        | WHI, Hsia et al. 2007        | WHI, Hsia et al. 2007    | WHI, Hsia et al. 2007    | WHI, Hsia et al. 2007    | WHI, Hsia et al. 2007    |                              |
| Prince et al. 2008                 |                              |                              | Prince et al. 2008       | Prince et al. 2008       |                          | Prince et al. 2008       |                              |
| Zhu et al. 2008                    |                              |                              |                          |                          |                          |                          |                              |
| OSTPRE-FPS, Kärkkäinen et al. 2010 |                              |                              |                          |                          |                          |                          |                              |
| Vital D, Sanders et al. 2010       | Vital D, Sanders et al. 2010 | Vital D, Sanders et al. 2010 |                          |                          |                          |                          | Vital D, Sanders et al. 2010 |
| Lehouck et al. 2012                |                              |                              |                          |                          |                          |                          |                              |
| VIDARIS, Murdoch et al. 2012       | VIDARIS, Murdoch et al. 2012 | VIDARIS, Murdoch et al. 2012 |                          |                          |                          |                          |                              |
| Davidson et al. 2013               | Davidson et al. 2013         | Davidson et al. 2013         |                          |                          |                          |                          |                              |
| VitDISH, Witham et al. 2013        |                              |                              |                          |                          |                          |                          |                              |
| RECORD, Ford et al. 2014           | RECORD, Ford et al. 2014     | RECORD, Ford et al. 2014     | RECORD, Ford et al. 2014 | RECORD, Ford et al. 2014 | RECORD, Ford et al. 2014 | RECORD, Ford et al. 2014 |                              |
| Baron et al. 2015                  |                              |                              | Baron et al. 2015        | Baron et al. 2015        |                          | Baron et al. 2015        |                              |

|                                 |                           |                           |                           |                           |                          |                           |                           |
|---------------------------------|---------------------------|---------------------------|---------------------------|---------------------------|--------------------------|---------------------------|---------------------------|
| Hansen et al. 2015              | Hansen et al. 2015        | Hansen et al. 2015        |                           |                           |                          |                           |                           |
| Uusi-Rasi et al. 2015           |                           |                           |                           |                           |                          |                           |                           |
| ViDiCO, Martineau et al. 2015   |                           |                           |                           |                           |                          |                           |                           |
| VIDEO, Arden et al. 2016        |                           |                           |                           |                           |                          |                           |                           |
| Brisson et al. 2017             | Brisson et al. 2017       | Brisson et al. 2017       |                           |                           |                          |                           |                           |
| Lappe et al. 2017               |                           |                           |                           |                           |                          |                           |                           |
| BEST-D, Hin et al. 2017         |                           |                           |                           |                           |                          |                           |                           |
| ViDA, Scragg et al. 2017        | ViDA, Scragg et al. 2017  | ViDA, Scragg et al. 2017  | ViDA, Scragg et al. 2017  | ViDA, Scragg et al. 2017  | ViDA, Scragg et al. 2017 | ViDA, Scragg et al. 2017  |                           |
| Nahas et al. 2018               | Nahas et al. 2018         | Nahas et al. 2018         |                           |                           |                          |                           |                           |
| ViDOS, Smith et al. 2018        | ViDOS, Smith et al. 2018  | ViDOS, Smith et al. 2018  |                           |                           |                          |                           |                           |
| Shea et al. 2019                | Shea et al. 2019          | Shea et al. 2019          |                           |                           |                          |                           |                           |
| VITAL, Manson et al. 2019       | VITAL, Manson et al. 2019 | VITAL, Manson et al. 2019 | VITAL, Manson et al. 2019 | VITAL, Manson et al. 2019 |                          | VITAL, Manson et al. 2019 | VITAL, Manson et al. 2019 |
| Jeong et al. 2020               | Jeong et al. 2020         | Jeong et al. 2020         |                           |                           |                          |                           |                           |
| Lukenda et al. 2020             | Lukenda et al. 2020       | Lukenda et al. 2020       |                           |                           |                          |                           |                           |
| Yang et al. 2020                | Yang et al. 2020          | Yang et al. 2020          |                           |                           |                          |                           |                           |
| DO-HEALTH, Bischoff et al. 2020 |                           |                           |                           |                           |                          |                           |                           |
| VIDAL, Rake et al. 2020         | VIDAL, Rake et al. 2020   | VIDAL, Rake et al. 2020   |                           |                           |                          |                           |                           |
| DPVD, Kawahara et al. 2022      |                           |                           |                           |                           |                          |                           |                           |

|                                 |                             |                             |                                |                                |                                |                            |
|---------------------------------|-----------------------------|-----------------------------|--------------------------------|--------------------------------|--------------------------------|----------------------------|
| D-Health, Neale et al. 2022     | D-Health, Neale et al. 2022 | D-Health, Neale et al. 2022 |                                |                                |                                |                            |
| FIND, Virtanen et al. 2022      | FIND, Virtanen et al. 2022  | FIND, Virtanen et al. 2022  | FIND, Virtanen et al. 2022     | FIND, Virtanen et al. 2022     | FIND, Virtanen et al. 2022     | FIND, Virtanen et al. 2022 |
| Ott & Chesnut. 1989             |                             |                             |                                |                                |                                |                            |
| Dawson et al. 1991              | Dawson et al. 1991          | Dawson et al. 1991          |                                |                                |                                |                            |
| Chapuy et al. 1992              |                             |                             |                                |                                |                                |                            |
| Chen et al. 1997                | Chen et al. 1997            | Chen et al. 1997            |                                |                                |                                |                            |
| Dawson et al. 1997              |                             |                             |                                |                                |                                |                            |
| Baeksgaard et al. 1998          |                             |                             |                                |                                |                                |                            |
| Krieg et al. 1999               |                             |                             |                                |                                |                                |                            |
| KOREPS, Komulainen et al. 1999  |                             |                             |                                |                                |                                |                            |
| STOP IT, Gallagher et al. 2001  |                             |                             | STOP IT, Gallagher et al. 2001 | STOP IT, Gallagher et al. 2001 | STOP IT, Gallagher et al. 2001 |                            |
| Decalyos II, Chapuy et al. 2002 |                             |                             |                                |                                |                                |                            |
| Cooper et al. 2003              |                             |                             |                                |                                |                                |                            |
| Larsen et al. 2004              |                             |                             |                                |                                |                                |                            |
| Aloia et al. 2005               |                             |                             |                                |                                |                                |                            |
| Brazier et al. 2005             | Brazier et al. 2005         | Brazier et al. 2005         | Brazier et al. 2005            | Brazier et al. 2005            | Brazier et al. 2005            |                            |
| Porthouse et al. 2005           |                             |                             |                                |                                |                                |                            |



|                                    |                                |                                |                             |                             |                             |                             |                             |
|------------------------------------|--------------------------------|--------------------------------|-----------------------------|-----------------------------|-----------------------------|-----------------------------|-----------------------------|
| VIP, Campbell et al. 2005          |                                |                                |                             |                             |                             |                             |                             |
| Lappe et al. 2007                  |                                |                                |                             |                             |                             |                             |                             |
| Smith et al. 2007                  |                                |                                |                             |                             |                             |                             |                             |
| Pfeifer et al. 2009                | Pfeifer et al. 2009            | Pfeifer et al. 2009            |                             |                             |                             |                             |                             |
| Zitterman et al. 2009              | Zitterman et al. 2009          | Zitterman et al. 2009          |                             |                             |                             |                             |                             |
| OSTPRE-FPS, Kärkkäinen et al. 2010 |                                |                                |                             |                             |                             |                             |                             |
| TIDE, Punthakee et al. 2012        | TIDE, Punthakee et al. 2012    | TIDE, Punthakee et al. 2012    | TIDE, Punthakee et al. 2012 | TIDE, Punthakee et al. 2012 | TIDE, Punthakee et al. 2012 | TIDE, Punthakee et al. 2012 | TIDE, Punthakee et al. 2012 |
| VICtORy, Wood et al. 2012          | VICtORy, Wood et al. 2012      | VICtORy, Wood et al. 2012      |                             |                             |                             |                             |                             |
| ViDA, Mason et al. 2014            | ViDA, Mason et al. 2014        | ViDA, Mason et al. 2014        |                             |                             |                             |                             |                             |
| VITADAS, Gallagher et al. 2014     | VITADAS, Gallagher et al. 2014 | VITADAS, Gallagher et al. 2014 |                             |                             |                             |                             |                             |
| DIVA, Barengolts et al. 2015       | DIVA, Barengolts et al. 2015   | DIVA, Barengolts et al. 2015   |                             |                             |                             |                             |                             |
| Jin et al. 2016                    |                                |                                | Jin et al. 2016             |                             |                             |                             |                             |
| Jorde et al. 2016                  |                                |                                | Jorde et al. 2016           | Jorde et al. 2016           |                             | Jorde et al. 2016           |                             |
| VINDICATE, Witte et al. 2016       |                                |                                |                             |                             |                             |                             |                             |
| EVIDENCE, Moreira et al. 2017      | EVIDENCE, Moreira et al. 2017  | EVIDENCE, Moreira et al. 2017  |                             |                             |                             |                             |                             |
| EVITA, Zittermann et al. 2017      | EVITA, Zittermann et al. 2017  | EVITA, Zittermann et al. 2017  |                             |                             |                             |                             |                             |
| D2d, Pittas et al. 2019            |                                |                                |                             |                             |                             |                             |                             |
| PODA, Aloia et al. 2019            |                                |                                |                             |                             |                             |                             |                             |

|                                |                         |                         |                       |                       |                       |
|--------------------------------|-------------------------|-------------------------|-----------------------|-----------------------|-----------------------|
| CALGB, Charlamb et al. 2021    |                         |                         |                       |                       |                       |
| Hu et al. 2023                 | Hu et al. 2023          | Hu et al. 2023          |                       |                       |                       |
| Inkovaara et al. 1983          | Inkovaara et al. 1983   | Inkovaara et al. 1983   | Inkovaara et al. 1983 | Inkovaara et al. 1983 | Inkovaara et al. 1983 |
| Meier et al. 2004              |                         |                         |                       |                       |                       |
| NONOF, Harwood et al. 2004     |                         |                         |                       |                       |                       |
| Moschonis & Manios 2006        | Moschonis & Manios 2006 | Moschonis & Manios 2006 |                       |                       |                       |
| Daly & Nowson 2009             |                         |                         |                       |                       |                       |
| Nieves et al. 2012             | Nieves et al. 2012      | Nieves et al. 2012      |                       |                       |                       |
| Toss & Magnusson 2012          | Toss & Magnusson 2012   | Toss & Magnusson 2012   |                       |                       |                       |
| Kuchay et al. 2015             | Kuchay et al. 2015      | Kuchay et al. 2015      |                       |                       |                       |
| Sinha-Hikim et al. 2015        | Sinha-Hikim et al. 2015 | Sinha-Hikim et al. 2015 |                       |                       |                       |
| PREVENT-WIN, Bhatt et al. 2020 | Ebadi et al. 2021       | Ebadi et al. 2021       |                       |                       |                       |
| Vahdat et al. 2022             | Vahdat et al. 2022      | Vahdat et al. 2022      |                       |                       |                       |

ACM: all-cause mortality; CVM: cardiovascular mortality; Non-CVM: non-cardiovascular mortality; MI: myocardial infarction; HF: heart failure; MACE: major adverse cardiovascular events; MACE+: MACE or coronary revascularization procedures (percutaneous coronary intervention or coronary artery bypass grafting).
